# Supplementary material for: Downward particle fluxes of biogenic matter and Saharan dust across the equatorial North Atlantic
Source: Copernicus journal article supplement (doi:10.5194/acp-17-6023-2017), 2017-05-16
Supplement: Supplementary file 1 [file acp-17-6023-2017-supplement.pdf]

Supplement of Atmos. Chem. Phys., 17, 6023–6040, 2017  
<http://www.atmos-chem-phys.net/17/6023/2017/>  
doi:10.5194/acp-17-6023-2017-supplement  
© Author(s) 2017. CC Attribution 3.0 License.

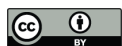

*Supplement of*

## **Downward particle fluxes of biogenic matter and Saharan dust across the equatorial North Atlantic**

**Laura F. Korte et al.**

*Correspondence to:* Laura F. Korte ([laura.korte@nioz.nl](mailto:laura.korte@nioz.nl))

The copyright of individual parts of the supplement might differ from the CC-BY 3.0 licence.

**Table S1. Chemical composition and concentration of various standards, including MESS-3 and PACS-2 (grey) used as quality control.**

| <b>Standard</b> | <b>Description</b> | <b>Al (cnts/TC)</b> | <b>Al (StDev)</b> | <b>Al (ppm)</b> | <b>Si (cnts/TC)</b> | <b>Si (StDev)</b> | <b>Si (ppm)</b> | <b>K (cnts/TC)</b> | <b>K (StDev)</b> | <b>K (ppm)</b> |
|-----------------|--------------------|---------------------|-------------------|-----------------|---------------------|-------------------|-----------------|--------------------|------------------|----------------|
| GSR-4           | Sandstone          | 0.00716             | 0.00022           | 18635           | 0.33305             | 0.00063           | 422276          | 0.01280            | 0.00012          | 5394           |
| GSR-6           | Carbonate rock     | 0.00236             | 0.00010           | 26471           | 0.02338             | 0.00014           | 72732           | 0.00278            | 0.00016          | 6555           |
| GSS-7           | Soil               | 0.02229             | 0.00009           | 154641          | 0.04826             | 0.00019           | 152429          | 0.00157            | 0.00003          | 1660           |
| JGb-1           | Gabbro             | 0.01366             | 0.00015           | 92594           | 0.06871             | 0.00020           | 204080          | -0.00045           | 0.00008          | 1991           |
| JLk-1           | Lake sediment      | 0.01681             | 0.00012           | 88571           | 0.12502             | 0.00043           | 267183          | 0.04116            | 0.00024          | 23276          |
| JLs-1           | Limestone          | 0.00018             | 0.00004           | 110             | -0.00052            | 0.00004           | 561             | -0.00064           | 0.00005          | 25             |
| JSd-3           | Stream sediment    | 0.01433             | 0.00020           | 52454           | 0.17607             | 0.00078           | 355247          | 0.03010            | 0.00014          | 16355          |
| MESS-3          | Marine sediment    | 0.01854             | 0.00030           | 85900           | 0.12643             | 0.00029           | 270000          | 0.04626            | 0.00017          | 26000          |
| PACS-2          | Marine sediment    | 0.01153             | 0.00025           | 66200           | 0.12830             | 0.00011           | 280000          | 0.01617            | 0.00030          | 12400          |
| SARM-1          | Granite            | 0.01947             | 0.00020           | 63953           | 0.23204             | 0.00094           | 353845          | 0.09650            | 0.00048          | 41406          |
| SARM-2          | Syenite            | 0.02333             | 0.00030           | 91800           | 0.17068             | 0.00048           | 297426          | 0.26810            | 0.00037          | 127372         |
| SARM-3          | Lujavrite          | 0.01396             | 0.00030           | 72212           | 0.10678             | 0.00041           | 244933          | 0.07206            | 0.00013          | 45721          |
| SARM-4          | Norite             | 0.01482             | 0.00033           | 87353           | 0.08476             | 0.00018           | 246055          | -0.00056           | 0.00014          | 2074           |

| <b>Standard</b> | <b>Description</b> | <b>Ca (cnts/TC)</b> | <b>Ca (StDev)</b> | <b>Ca (ppm)</b> | <b>Ti (cnts/TC)</b> | <b>Ti (StDev)</b> | <b>Ti (ppm)</b> | <b>Fe (cnts/TC)</b> | <b>Fe (StDev)</b> | <b>Fe (ppm)</b> |
|-----------------|--------------------|---------------------|-------------------|-----------------|---------------------|-------------------|-----------------|---------------------|-------------------|-----------------|
| GSR-4           | Sandstone          | 0.00502             | 0.00012           | 2143            | 0.00798             | 0.00041           | 1590            | 0.11867             | 0.00032           | 22242           |
| GSR-6           | Carbonate rock     | 0.54608             | 0.00028           | 254929          | 0.00161             | 0.00015           | 1950            | 0.03038             | 0.00017           | 17416           |
| GSS-7           | Soil               | 0.00151             | 0.00011           | 1143            | 0.07487             | 0.00028           | 20100           | 0.41156             | 0.00027           | 131774          |
| JGb-1           | Gabbro             | 0.18885             | 0.00028           | 85000           | 0.01978             | 0.00026           | 9589            | 0.22578             | 0.00037           | 105335          |
| JLk-1           | Lake sediment      | 0.00965             | 0.00022           | 4900            | 0.01516             | 0.00019           | 4004            | 0.20102             | 0.00025           | 48464           |
| JLs-1           | Limestone          | 0.60965             | 0.00054           | 393500          | 0.00008             | 0.00006           | 10              | 0.00164             | 0.00016           | 124             |
| JSd-3           | Stream sediment    | 0.00574             | 0.00020           | 4000            | 0.00778             | 0.00010           | 2415            | 0.10576             | 0.00046           | 30551           |
| MESS-3          | Marine sediment    | 0.03356             | 0.00017           | 14700           | 0.01479             | 0.00033           | 4400            | 0.17640             | 0.00038           | 43400           |
| PACS-2          | Marine sediment    | 0.04499             | 0.00018           | 19600           | 0.01508             | 0.00023           | 4400            | 0.17280             | 0.00041           | 40900           |
| SARM-1          | Granite            | 0.01432             | 0.00014           | 5571            | 0.00183             | 0.00021           | 540             | 0.06600             | 0.00041           | 14269           |
| SARM-2          | Syenite            | 0.00759             | 0.00023           | 4857            | 0.00025             | 0.00026           | 265             | 0.03782             | 0.00018           | 10072           |
| SARM-3          | Lujavrite          | 0.04442             | 0.00023           | 23000           | 0.00645             | 0.00027           | 2877            | 0.18540             | 0.00057           | 70223           |
| SARM-4          | Norite             | 0.16505             | 0.00027           | 82190           | 0.00126             | 0.00023           | 1199            | 0.13679             | 0.00023           | 63649           |

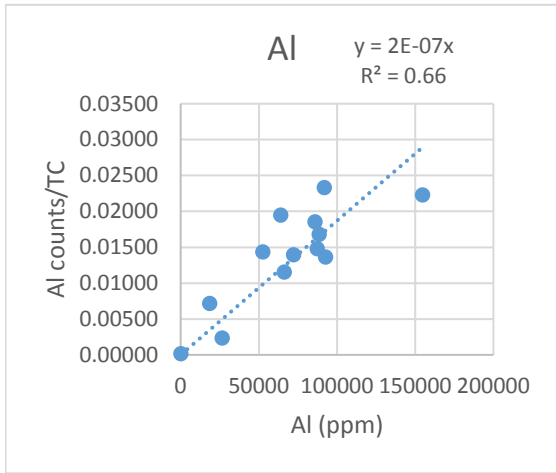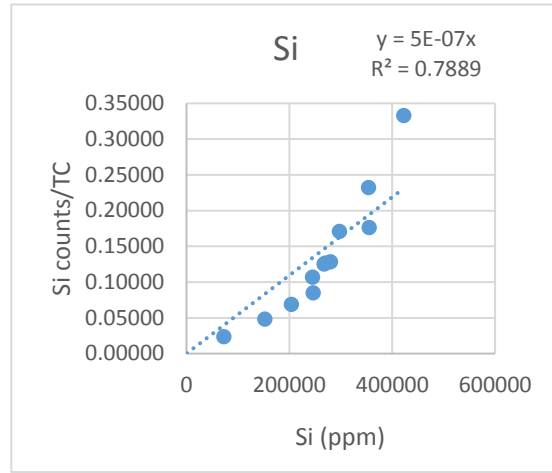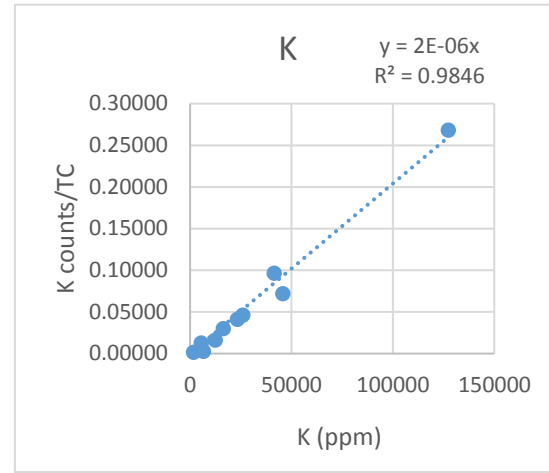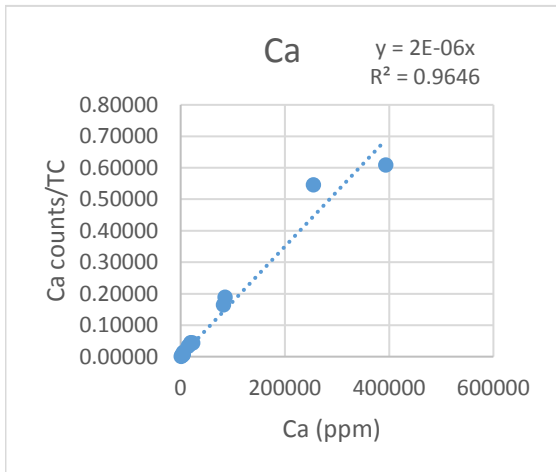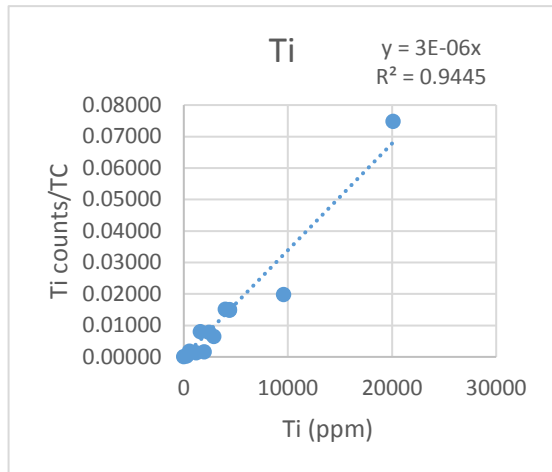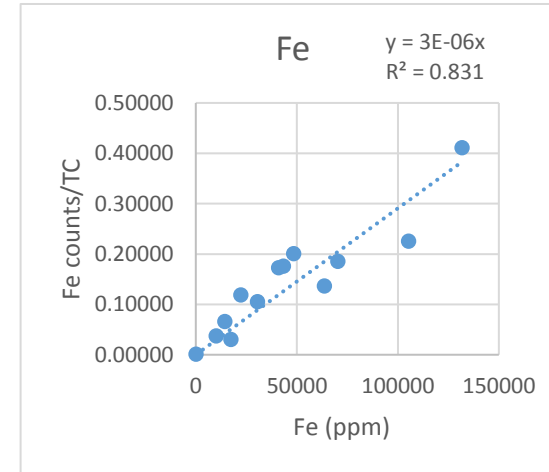

**Table S2.** Pearson correlation coefficients,  $r$ , of measured parameters of all sediment traps and MWAC sampler. Left (lower) side of the tables represent  $r$  values, and right (upper) side of the tables represent  $p$  values. Green marked values show  $p$  values  $< 0.01$  and yellow marked values represent  $p$  values  $< 0.05$  for  $p$  and  $r$  values, respectively.

| M1U   | TM    | CaCO3 | BSiO2 | OM    | Rest  | Al    | Si    | K     | Ti    | Fe    |
|-------|-------|-------|-------|-------|-------|-------|-------|-------|-------|-------|
| TM    |       | 0.860 | 0.282 | 0.660 | 0.648 | 0.505 | 0.355 | 0.924 | 0.761 | 0.961 |
| CaCO3 | -0.04 |       | 0.091 | 0.855 | 0.000 | 0.000 | 0.000 | 0.000 | 0.000 | 0.000 |
| BSiO2 | -0.25 | 0.38  |       | 0.001 | 0.001 | 0.014 | 0.048 | 0.002 | 0.004 | 0.003 |
| OM    | -0.10 | -0.04 | 0.66  |       | 0.153 | 0.161 | 0.398 | 0.143 | 0.226 | 0.154 |
| Rest  | 0.11  | -0.92 | -0.67 | -0.32 |       | 0.000 | 0.000 | 0.000 | 0.000 | 0.000 |
| Al    | -0.15 | -0.75 | -0.53 | -0.32 | 0.83  |       | 0.000 | 0.000 | 0.000 | 0.000 |
| Si    | -0.21 | -0.79 | -0.44 | -0.19 | 0.81  | 0.84  |       | 0.000 | 0.000 | 0.000 |
| K     | 0.02  | -0.78 | -0.63 | -0.33 | 0.87  | 0.95  | 0.86  |       | 0.000 | 0.000 |
| Ti    | -0.07 | -0.88 | -0.60 | -0.28 | 0.94  | 0.91  | 0.93  | 0.95  |       | 0.000 |
| Fe    | -0.01 | -0.74 | -0.62 | -0.32 | 0.83  | 0.95  | 0.86  | 0.98  | 0.92  |       |

<0,01  
<0,05

| M2U   | TM    | CaCO3 | BSiO2 | OM    | Rest  | Al    | Si    | K     | Ti    | Fe    |
|-------|-------|-------|-------|-------|-------|-------|-------|-------|-------|-------|
| TM    |       | 0.220 | 0.693 | 0.233 | 0.255 | 0.903 | 0.644 | 0.676 | 0.651 | 0.859 |
| CaCO3 | 0.26  |       | 0.812 | 0.000 | 0.000 | 0.005 | 0.003 | 0.001 | 0.000 | 0.034 |
| BSiO2 | 0.09  | 0.05  |       | 0.420 | 0.133 | 0.134 | 0.613 | 0.020 | 0.064 | 0.109 |
| OM    | -0.25 | -0.74 | 0.17  |       | 0.009 | 0.484 | 0.095 | 0.167 | 0.136 | 0.617 |
| Rest  | -0.24 | -0.94 | -0.32 | 0.52  |       | 0.000 | 0.006 | 0.000 | 0.000 | 0.007 |
| Al    | 0.03  | -0.56 | -0.31 | 0.15  | 0.66  |       | 0.000 | 0.000 | 0.000 | 0.000 |
| Si    | 0.10  | -0.58 | 0.11  | 0.35  | 0.55  | 0.88  |       | 0.000 | 0.000 | 0.000 |
| K     | -0.09 | -0.62 | -0.47 | 0.29  | 0.72  | 0.93  | 0.77  |       | 0.000 | 0.000 |
| Ti    | -0.10 | -0.68 | -0.38 | 0.31  | 0.77  | 0.95  | 0.82  | 0.96  |       | 0.000 |
| Fe    | 0.04  | -0.43 | -0.34 | 0.11  | 0.54  | 0.93  | 0.84  | 0.90  | 0.87  |       |

<0,01  
<0,05

| M2L   | TM    | CaCO3 | BSiO2 | OM    | Rest  | Al    | Si    | K     | Ti    | Fe    |
|-------|-------|-------|-------|-------|-------|-------|-------|-------|-------|-------|
| TM    |       | 0.000 | 0.102 | 0.003 | 0.001 | 0.008 | 0.002 | 0.017 | 0.009 | 0.011 |
| CaCO3 | 0.66  |       | 0.272 | 0.000 | 0.000 | 0.000 | 0.000 | 0.001 | 0.000 | 0.008 |
| BSiO2 | -0.34 | -0.23 |       | 0.097 | 0.818 | 0.240 | 0.942 | 0.238 | 0.587 | 0.152 |
| OM    | -0.58 | -0.92 | 0.35  |       | 0.000 | 0.008 | 0.004 | 0.013 | 0.003 | 0.084 |
| Rest  | -0.62 | -0.98 | 0.05  | 0.85  |       | 0.000 | 0.000 | 0.000 | 0.000 | 0.002 |
| Al    | -0.53 | -0.67 | -0.25 | 0.53  | 0.73  |       | 0.000 | 0.000 | 0.000 | 0.000 |
| Si    | -0.61 | -0.67 | 0.02  | 0.57  | 0.69  | 0.93  |       | 0.000 | 0.000 | 0.000 |
| K     | -0.48 | -0.64 | -0.25 | 0.50  | 0.70  | 0.96  | 0.93  |       | 0.000 | 0.000 |
| Ti    | -0.52 | -0.74 | -0.12 | 0.57  | 0.79  | 0.96  | 0.93  | 0.96  |       | 0.000 |
| Fe    | -0.51 | -0.53 | -0.30 | 0.36  | 0.61  | 0.88  | 0.89  | 0.92  | 0.88  |       |

<0,01

<0,05

| M3L   | TM    | CaCO3 | BSiO2 | OM   | Rest | Al   | Si   | K    | Ti   | Fe   |
|-------|-------|-------|-------|------|------|------|------|------|------|------|
| TM    |       | 0.01  | 0.02  | 0.13 | 0.01 | 0.01 | 0.02 | 0.01 | 0.01 | 0.24 |
| CaCO3 | 0.54  |       | 0.01  | 0.00 | 0.00 | 0.00 | 0.00 | 0.00 | 0.00 | 0.00 |
| BSiO2 | -0.46 | -0.52 |       | 0.00 | 0.13 | 0.70 | 0.06 | 0.62 | 0.43 | 0.79 |
| OM    | -0.32 | -0.85 | 0.57  |      | 0.00 | 0.01 | 0.00 | 0.01 | 0.00 | 0.01 |
| Rest  | -0.50 | -0.97 | 0.32  | 0.75 |      | 0.00 | 0.00 | 0.00 | 0.00 | 0.00 |
| Al    | -0.50 | -0.80 | 0.08  | 0.53 | 0.88 |      | 0.00 | 0.00 | 0.00 | 0.00 |
| Si    | -0.48 | -0.86 | 0.39  | 0.66 | 0.86 | 0.92 |      | 0.00 | 0.00 | 0.00 |
| K     | -0.49 | -0.79 | 0.11  | 0.54 | 0.86 | 0.98 | 0.92 |      | 0.00 | 0.00 |
| Ti    | -0.49 | -0.85 | 0.17  | 0.63 | 0.91 | 0.98 | 0.92 | 0.98 |      | 0.00 |
| Fe    | -0.25 | -0.66 | 0.06  | 0.51 | 0.72 | 0.88 | 0.89 | 0.91 | 0.87 |      |

<0,01

<0,05

| M4U   | TM    | CaCO3 | BSiO2 | OM    | Rest | Al   | Si   | K    | Ti   | Fe   |
|-------|-------|-------|-------|-------|------|------|------|------|------|------|
| TM    |       | 0.04  | 0.51  | 0.59  | 0.01 | 0.22 | 0.87 | 0.04 | 0.06 | 0.27 |
| CaCO3 | 0.44  |       | 0.63  | 0.01  | 0.00 | 0.01 | 0.23 | 0.01 | 0.01 | 0.09 |
| BSiO2 | 0.15  | -0.11 |       | 0.45  | 0.14 | 0.47 | 0.00 | 0.04 | 0.01 | 0.01 |
| OM    | -0.12 | -0.56 | -0.17 |       | 0.07 | 0.48 | 0.09 | 0.88 | 0.55 | 0.87 |
| Rest  | -0.51 | -0.87 | -0.33 | 0.39  |      | 0.00 | 0.92 | 0.00 | 0.00 | 0.00 |
| Al    | -0.27 | -0.55 | -0.16 | -0.16 | 0.73 |      | 0.08 | 0.00 | 0.00 | 0.00 |
| Si    | 0.04  | -0.27 | 0.77  | -0.37 | 0.02 | 0.38 |      | 0.56 | 0.94 | 0.98 |
| K     | -0.45 | -0.54 | -0.43 | 0.03  | 0.79 | 0.90 | 0.13 |      | 0.00 | 0.00 |
| Ti    | -0.41 | -0.57 | -0.51 | 0.13  | 0.84 | 0.85 | 0.02 | 0.93 |      | 0.00 |
| Fe    | -0.25 | -0.37 | -0.56 | 0.04  | 0.67 | 0.83 | 0.01 | 0.91 | 0.93 |      |

&lt;0,01

&lt;0,05

| M4L   | TM    | CaCO3 | BSiO2 | OM    | Rest  | Al    | Si    | K     | Ti    | Fe    |
|-------|-------|-------|-------|-------|-------|-------|-------|-------|-------|-------|
| TM    |       | 0.588 | 0.003 | 0.007 | 0.015 | 0.022 | 0.030 | 0.043 | 0.160 | 0.038 |
| CaCO3 | -0.12 |       | 0.000 | 0.003 | 0.002 | 0.054 | 0.000 | 0.065 | 0.001 | 0.174 |
| BSiO2 | 0.58  | -0.67 |       | 0.000 | 0.495 | 0.330 | 0.000 | 0.219 | 0.791 | 0.142 |
| OM    | 0.53  | -0.59 | 0.75  |       | 0.431 | 0.056 | 0.008 | 0.080 | 0.801 | 0.031 |
| Rest  | -0.49 | -0.61 | -0.15 | -0.17 |       | 0.000 | 0.373 | 0.000 | 0.000 | 0.000 |
| Al    | -0.47 | -0.40 | -0.21 | -0.40 | 0.85  |       | 0.322 | 0.000 | 0.000 | 0.000 |
| Si    | 0.44  | -0.80 | 0.89  | 0.53  | 0.19  | 0.21  |       | 0.446 | 0.041 | 0.546 |
| K     | -0.42 | -0.38 | -0.26 | -0.36 | 0.86  | 0.97  | 0.16  |       | 0.000 | 0.000 |
| Ti    | -0.30 | -0.63 | 0.06  | -0.05 | 0.83  | 0.91  | 0.42  | 0.91  |       | 0.000 |
| Fe    | -0.42 | -0.29 | -0.31 | -0.44 | 0.80  | 0.94  | 0.13  | 0.96  | 0.84  |       |

&lt;0,01

&lt;0,05

| M5L   | TM    | CaCO3 | BSiO2 | OM    | Rest  | Al    | Si    | K     | Ti    | Fe    |
|-------|-------|-------|-------|-------|-------|-------|-------|-------|-------|-------|
| TM    |       | 0.067 | 0.440 | 0.916 | 0.001 | 0.000 | 0.929 | 0.000 | 0.001 | 0.222 |
| CaCO3 | -0.38 |       | 0.007 | 0.006 | 0.004 | 0.002 | 0.002 | 0.031 | 0.002 | 0.367 |
| BSiO2 | -0.17 | -0.53 |       | 0.715 | 0.061 | 0.543 | 0.000 | 0.170 | 0.752 | 0.864 |
| OM    | -0.02 | -0.54 | 0.08  |       | 0.063 | 0.714 | 0.600 | 0.910 | 0.958 | 0.917 |
| Rest  | 0.63  | -0.56 | -0.39 | 0.39  |       | 0.000 | 0.224 | 0.000 | 0.001 | 0.208 |
| Al    | 0.78  | -0.60 | -0.13 | 0.08  | 0.84  |       | 0.765 | 0.000 | 0.000 | 0.007 |
| Si    | -0.02 | -0.61 | 0.96  | 0.11  | -0.26 | 0.06  |       | 0.715 | 0.225 | 0.409 |
| K     | 0.73  | -0.44 | -0.29 | 0.02  | 0.82  | 0.97  | -0.08 |       | 0.000 | 0.001 |
| Ti    | 0.63  | -0.60 | 0.07  | 0.01  | 0.65  | 0.90  | 0.26  | 0.89  |       | 0.001 |
| Fe    | 0.26  | -0.19 | -0.04 | 0.02  | 0.27  | 0.53  | 0.18  | 0.62  | 0.63  |       |

<0,01  
<0,05

| Iwik | Al   | Si    | K     | Ti    | Fe    |
|------|------|-------|-------|-------|-------|
| Al   |      | 0.000 | 0.000 | 0.000 | 0.000 |
| Si   | 0.89 |       | 0.000 | 0.002 | 0.002 |
| K    | 0.98 | 0.90  |       | 0.000 | 0.000 |
| Ti   | 0.94 | 0.81  | 0.96  |       | 0.000 |
| Fe   | 0.96 | 0.81  | 0.95  | 0.95  |       |

<0,01  
<0,05

**Table S3. Linear regressions and correlation coefficients for Ti versus Al for Iwik and all sediment traps**

| Site | Regression equation | R <sup>2</sup> |
|------|---------------------|----------------|
| Iwik | y = 0.8391x + 0.04  | 0.81           |
| M1U  | y = 0.8824x + 0.03  | 0.83           |
| M2U  | y = 0.757 x - 0.00  | 0.89           |
| M2L  | y = 0.8062x - 0.01  | 0.92           |
| M3L  | y = 0.8235x - 0.02  | 0.96           |
| M4U  | y = 0.6037x + 0.01  | 0.72           |
| M4L  | y = 0.5439x - 0.01  | 0.82           |
| M5L  | y = 0.4358x + 0.02  | 0.81           |

**Table S4. Pearson correlation coefficients,  $r$ , of the residual mass fraction in % for the seven sediment traps M1 to M5. Left (lower) side of the tables represent  $r$  values, and right (upper) side of the tables represent  $p$  values. Green marked values show  $p$  values < 0.01 and yellow marked values represent  $p$  values < 0.05 for  $p$  and  $r$  values, respectively.**

|     | M1U   | M2U   | M2L   | M3L   | M4U   | M4L   | M5L   |
|-----|-------|-------|-------|-------|-------|-------|-------|
| M1U |       | 0.005 | 0.031 | 0.026 | 0.034 | 0.208 | 0.003 |
| M2U | 0.56  |       | 0.000 | 0.000 | 0.000 | 0.000 | 0.078 |
| M2L | 0.44  | 0.72  |       | 0.000 | 0.011 | 0.000 | 0.158 |
| M3L | 0.45  | 0.86  | 0.73  |       | 0.000 | 0.000 | 0.159 |
| M4U | 0.43  | 0.73  | 0.51  | 0.83  |       | 0.000 | 0.093 |
| M4L | 0.27  | 0.71  | 0.74  | 0.75  | 0.64  |       | 0.056 |
| M5L | -0.59 | -0.38 | -0.3  | -0.35 | -0.4  | -0.69 |       |

<0,01  
<0,05
